# Supplementary material
Source: Research Square preprint supplement (doi:10.21203/rs.3.rs-8960268/v1)
Supplement: Supplementary file 2 [file ee31639620a2e43ede2226e0.docx]

**Appendix A: P-Values**

Significant P-Values from Synovial Fluid IL-1ra Analysis (p-value ≤ 0.05)

| **Comparison** | **Time Point** | **P-value** |
| --- | --- | --- |
| scAAV2IL-1ra to Sham Control | Day 28 | <0.0001 |
| scAAV2IL-1ra to Saline Control | Day 28 | 0.0002 |
| Combination scAAV2IL-1ra/scAAV2IGF-I to Sham Control | Day 28 | <0.0001 |
| Combination scAAV2IL-1ra/scAAV2IGF-I to Saline Control | Day 28 | 0.0008 |
| scAAV2IL-1ra to Sham Control | Day 42 | <0.0001 |
| scAAV2IL-1ra to Saline Control | Day 42 | <0.0001 |
| Combination scAAV2IL-1ra/scAAV2IGF-I to Sham Control | Day 42 | 0.0002 |
| Combination scAAV2IL-1ra/scAAV2IGF-I to Saline Control | Day 42 | 0.0023 |
| scAAV2IL-1ra to Sham Control | Day 56 | <0.0001 |
| scAAV2IL-1ra to Saline Control | Day 56 | 0.0001 |
| Combination scAAV2IL-1ra/scAAV2IGF-I to Sham Control | Day 56 | <0.0001 |
| Combination scAAV2IL-1ra/scAAV2IGF-I to Saline Control | Day 56 | 0.0001 |
| scAAV2IL-1ra to Sham Control | Day 70 | <0.0001 |
| scAAV2IL-1ra to Saline Control | Day 70 | 0.0002 |
| Combination scAAV2IL-1ra/scAAV2IGF-I to Sham Control | Day 70 | <0.0001 |
| Combination scAAV2IL-1ra/scAAV2IGF-I to Saline Control | Day 70 | <0.0001 |
| scAAV2IL-1ra to Sham Control | Day 84 | <0.0001 |
| scAAV2IL-1ra to Saline Control | Day 84 | 0.0001 |
| Combination scAAV2IL-1ra/scAAV2IGF-I to Sham Control | Day 84 | 0.0001 |
| Combination scAAV2IL-1ra/scAAV2IGF-I to Saline Control | Day 84 | 0.0046 |
| scAAV2IL-1ra to Sham Control | Day 98 | <0.0001 |
| scAAV2IL-1ra to Saline Control | Day 98 | <0.0001 |
| Combination scAAV2IL-1ra/scAAV2IGF-I to Sham Control | Day 98 | <0.0001 |
| Combination scAAV2IL-1ra/scAAV2IGF-I to Saline Control | Day 98 | 0.0001 |
| scAAV2IL-1ra to Sham Control | Day 112 | <0.0001 |
| scAAV2IL-1ra to Saline Control | Day 112 | 0.0001 |
| Combination scAAV2IL-1ra/scAAV2IGF-I to Sham Control | Day 112 | 0.0001 |
| Combination scAAV2IL-1ra/scAAV2IGF-I to Saline Control | Day 112 | 0.0012 |

Significant P-Values from Synovial Fluid IGF-I Analysis (p-value ≤ 0.05)

| **Comparison** | **Time Point** | **P-value** |
| --- | --- | --- |
| Combination scAAV2IL-1ra/scAAV2IGF-I to Sham Control | Day 28 | 0.0018 |
| Combination scAAV2IL-1ra/scAAV2IGF-I to scAAV2IL-1ra | Day 28 | 0.0026 |
| Combination scAAV2IL-1ra/scAAV2IGF-I to Sham Control | Day 42 | <0.0001 |
| Combination scAAV2IL-1ra/scAAV2IGF-I to scAAV2IL-1ra | Day 42 | 0.0002 |
| Combination scAAV2IL-1ra/scAAV2IGF-I to Saline Control | Day 42 | 0.0176 |
| Combination scAAV2IL-1ra/scAAV2IGF-I to Sham Control | Day 56 | 0.0001 |
| Combination scAAV2IL-1ra/scAAV2IGF-I to scAAV2IL-1ra | Day 56 | 0.0057 |
| Combination scAAV2IL-1ra/scAAV2IGF-I to Saline Control | Day 56 | 0.0008 |
| Combination scAAV2IL-1ra/scAAV2IGF-I to Sham Control | Day 70 | 0.0028 |
| Combination scAAV2IL-1ra/scAAV2IGF-I to Saline Control | Day 70 | 0.0234 |
| Combination scAAV2IL-1ra/scAAV2IGF-I to Sham Control | Day 84 | <0.0001 |
| Combination scAAV2IL-1ra/scAAV2IGF-I to Saline Control | Day 84 | 0.0003 |
| scAAV2IL-1ra to Sham Control | Day 84 | 0.0162 |
| scAAV2IL-1ra to Saline Control | Day 84 | 0.0316 |
| Combination scAAV2IL-1ra/scAAV2IGF-I to Sham Control | Day 98 | <0.0001 |
| Combination scAAV2IL-1ra/scAAV2IGF-I to scAAV2IL-1ra | Day 98 | 0.0022 |
| Combination scAAV2IL-1ra/scAAV2IGF-I to Saline Control | Day 98 | 0.0001 |
| Combination scAAV2IL-1ra/scAAV2IGF-I to Sham Control | Day 112 | 0.0016 |
| Combination scAAV2IL-1ra/scAAV2IGF-I to scAAV2IL-1ra | Day 112 | 0.0077 |
| Combination scAAV2IL-1ra/scAAV2IGF-I to Saline Control | Day 112 | 0.0096 |

Significant P-Values from Radiographic Total OA Score Analysis (p-value ≤ 0.05)

| **Comparison** | **Time Point** | **P-value** |
| --- | --- | --- |
| scAAV2IL-1ra to Sham Control | Day 14 | 0.0181 |
| Combination scAAV2IL-1ra/scAAV2IGF-I to Sham Control | Day 14 | 0.0112 |
| Saline control to Sham Control | Day 14 | 0.0433 |
| scAAV2IL-1ra to Sham Control | Day 56 | <0.0001 |
| Combination scAAV2IL-1ra/scAAV2IGF-I to Sham Control | Day 56 | <0.0001 |
| Saline control to Sham Control | Day 56 | <0.0001 |
| scAAV2IL-1ra to Sham Control | Day 112 | <0.0001 |
| Combination scAAV2IL-1ra/scAAV2IGF-I to Sham Control | Day 112 | <0.0001 |
| Saline control to Sham Control | Day 112 | <0.0001 |

Significant P-Values from MRI Total OA Score Analysis (p-value ≤ 0.05)

| **Comparison** | **Time Point** | **P-value** |
| --- | --- | --- |
| scAAV2IL-1ra to Sham Control | Day 112 | 0.0011 |
| Combination scAAV2IL-1ra/scAAV2IGF-I to Sham Control | Day 112 | <0.0001 |
| Saline control to Sham Control | Day 112 | <0.0001 |

Significant P-Values from Cartilage Erosion Total Score Analysis (p-value ≤ 0.05)

| **Comparison** | **Time Point** | **P-value** |
| --- | --- | --- |
| scAAV2IL-1ra to Sham Control | Day 112 | 0.0273 |
| Combination scAAV2IL-1ra/scAAV2IGF-I to Sham Control | Day 112 | 0.0001 |
| Saline control to Sham Control | Day 112 | 0.0456 |
